# Supplementary material
Source: Springer Nature journal article supplement (https://www.springermedizin.de/resource/supplementary/12936_2014_3326_MOESM1_ESM.pdf/9545666)
Supplement: MOESM1 [file 9545666]

A green and black self-supporting tent is shown from the inside. A white bed net is suspended in the center. The tent has a curved top and a large opening at the front. A black flap is visible on the left side of the opening. The tent is set up on a light-colored floor against a light-colored wall.

self-supporting tent

bed net

← sealable tent flap
